# Supplementary material for: Combined effects of aging and inflammation on renin-angiotensin system mediate mitochondrial dysfunction and phenotypic changes in cardiomyopathies
Source: PubMed Central journal article supplement (PMC4494917; doi:10.18632/oncotarget.3979), 2015-05-18
Supplement: oncotarget-06-11979-s001.pdf [file oncotarget-06-11979-s001.pdf]

**SUPPLEMENTARY FIGURE**

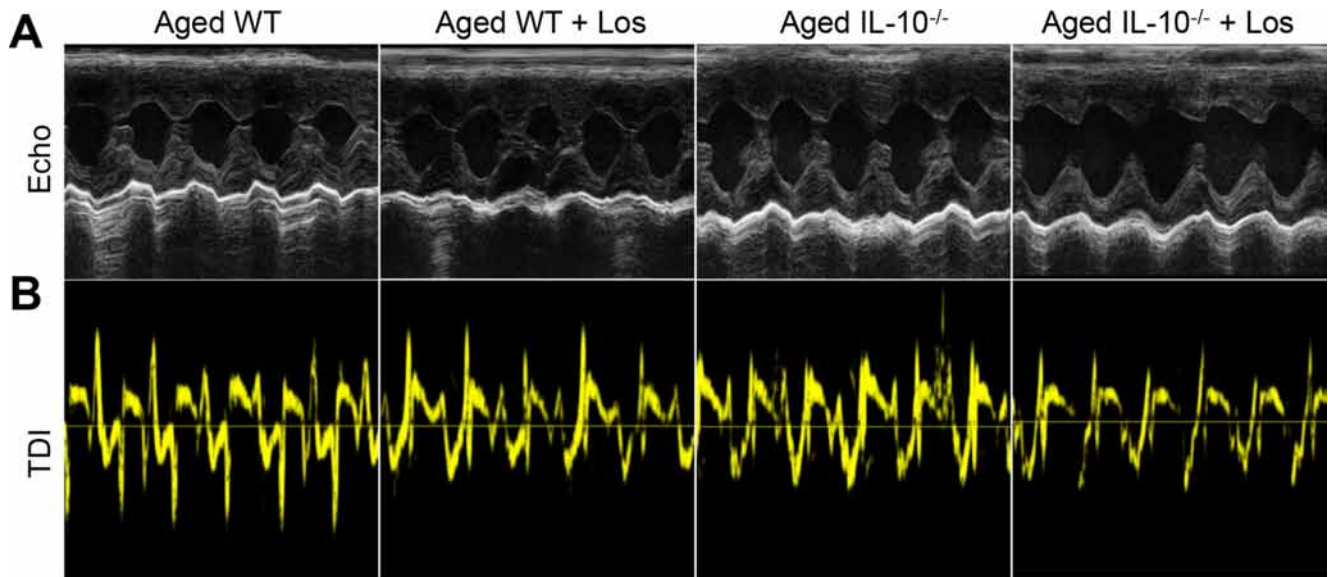

**Supplementary Figure S1: Representative images of cardiac function with and without Losartan treatment. A.** Echocardiography (Echo) and **B.** Tissue Doppler Images (TDI) of aged Wild-type (WT) and aged IL-10<sup>-/-</sup> mice with (+Los) or without losartan treatment.
